# Supplementary material
Source: PubMed Central journal article supplement (PMC1810011)
Supplement: 15252972supp.pdf [file 15252972supp.pdf]

This is an electronic appendix to the Biology Letter by Borrell 2004 Suction feeding in orchid bees (Apidae: Euglossini). *Proc. R. Soc. Lond. B* (Suppl.) **271**, S164–S166. (DOI 10.1098/rsbl.2003.0128.)

Electronic appendices are refereed with the text. However, no attempt has been made to impose a uniform editorial style on the electronic appendices.

### Electronic Appendix A

Table 1. Samples sizes for species observed feeding.

| <b>Species</b>                 | <b>Sample Size</b> |
|--------------------------------|--------------------|
| <i>Eufriesea anisochlora</i>   | 8                  |
| <i>Eufriesea chrysopyga</i>    | 3                  |
| <i>Eufriesea corusca</i>       | 1                  |
| <i>Eufriesea duckei</i>        | 3                  |
| <i>Eufriesea lucifera</i>      | 1                  |
| <i>Eufriesea mussitans</i>     | 1                  |
| <i>Eufriesea pulchra</i>       | 11                 |
| <i>Eufriesea schmidtiana</i>   | 7                  |
| <i>Euglossa allosticta</i>     | 19                 |
| <i>Euglossa asarophora</i>     | 7                  |
| <i>Euglossa bursigera</i>      | 1                  |
| <i>Euglossa championi</i>      | 13                 |
| <i>Euglossa cognata</i>        | 2                  |
| <i>Euglossa crassipunctata</i> | 15                 |
| <i>Euglossa cybelia</i>        | 7                  |
| <i>Euglossa dodsoni</i>        | 7                  |
| <i>Euglossa flammea</i>        | 3                  |
| <i>Euglossa hansonii</i>       | 18                 |
| <i>Euglossa ignita</i>         | 8                  |
| <i>Euglossa imperialis</i>     | 372                |
| <i>Euglossa mixta</i>          | 13                 |
| <i>Euglossa purpurea</i>       | 60                 |
| <i>Euglossa sapphirina</i>     | 65                 |
| <i>Euglossa tridentata</i>     | 18                 |
| <i>Eulaema cingulata</i>       | 20                 |
| <i>Eulaema meriana</i>         | 19                 |
| <i>Eulaema nigrita</i>         | 12                 |
| <i>Eulaema polychroma</i>      | 1                  |
| <i>Exaerete frontalis</i>      | 19                 |
| <i>Exaerete smaragdina</i>     | 1                  |
| <b>Total</b>                   | <b>735</b>         |
